# Supplementary material
Source: PubMed Central journal article supplement (PMC8996298)

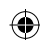

### Supplementary Table I

#### Detailed items of the Mediterranean Lifestyle (MEDLIFE) questionnaire

| Items                                                                                                                                                                                                | Criteria for 1 point* |
|------------------------------------------------------------------------------------------------------------------------------------------------------------------------------------------------------|-----------------------|
| <i>Block 1: Mediterranean food consumption</i>                                                                                                                                                       |                       |
| How many serving of pastries do you consume per week? (candy (1s=1 unit or 50 g), chocolates (1 s=30gr), biscuits (1 s=4-6 units), turrón (1s=40 g))                                                 | ≤2 s/week             |
| How many servings of red meat do you consume per week? (Beef, pork, lamb (1 s=100-150g))                                                                                                             | <2 s/week             |
| How many serving of processed meat do you consume per week? (Ham (1 s=1 slice or 30 g), sausage, soft spicy sausage, bacon (1 s=50 g), hamburger (1 s=1 unit), liver (1 s=100-150g), pathe (1s=25g)) | ≤1 s/week             |
| How many eggs do you consume per week? (Eggs (1 egg))                                                                                                                                                | 2-4 s/week            |
| How many serving of legumes do you consume per week? (Lentils, beans, peas, chickpeas (1 s=1 plate or 150 g))                                                                                        | ≥2/ week              |
| How many servings of white meat do you consume per week? (Poultry, rabbit (1 s=100-150 g))                                                                                                           | 2 s/ week             |
| How many serving of fish or seafood portions do you consume per week? (White/oily fish (1 s=100-150 g), canned fish (1 s=1 can or 50 g), seafood (1 s=200g))                                         | ≥2/ week              |
| How many potatoes do you consume per week? (Roast/boiled potatoes, French fries (1 s=150-200 g))                                                                                                     | ≤3 s/week             |
| How many low fat dairy products do you consume per day? (Skimmed dairy milk (1s=200 ml milk, two yoghurts, 1 portion soft cheese))                                                                   | 2 s/day               |
| How many nuts and olives do you consume per day? (Walnuts, almonds, hazelnuts (1s=1 handful or 30 g), olives (1 s=10 units))                                                                         | 1-2 s/day             |
| How many times do you use herbs, spices and garnish for cooking per day? (Onion, garlic, herbs (parsley, oregano))                                                                                   | ≥1 s/day              |
| How many pieces of fruit do you consume per day? (All fruit and fresh fruit-based juices (1 s=150-200g))                                                                                             | 3-6 s/day             |
| How many serving of vegetables you consume per day? (All vegetables except potatoes (1 s=150-200 g))                                                                                                 | ≥2 s/day              |
| How many olive oil tablespoons do you consume per day (cooking or dress salad)? (Olive oil, virgin olive oil (1s=1Tablespoon))                                                                       | ≥3 s/day              |
| How many serving of cereals you consume per day? (White and whole-grain bread (1s=40 g), cereals (1s=1 plate rice, pasta or 40g breakfast cereals) and derivatives)                                  | 3-6 s /day            |
| <i>Block 2: Mediterranean dietary habits</i>                                                                                                                                                         |                       |
| Do you drink more than 6 glasses of water or at least one cup of tea per day? (Water or tea (1 s=1 glass))                                                                                           | Yes                   |
| Do you drink wine during the meals every day? (White/red wine (1 s=1 glass of wine))                                                                                                                 | 1-2 s/ day            |
| Do you limit salt in meals?                                                                                                                                                                          | Yes                   |
| Do you usually choose whole grain products? (bread, pasta, rice, breakfast cereals)                                                                                                                  | Yes                   |
| Do you consume snacks 2 or less time per week? (potatoes chips, tortilla chips, popcorn (1 s=1 bag or 50 g))                                                                                         | Yes                   |
| Do you usually limit nibbling between meals?                                                                                                                                                         | Yes                   |
| Do you limit sugar in beverages? (including sugar-sweetened beverages)                                                                                                                               | Yes                   |
| Do you prefer and consume seasonal and traditional local products, fresh and minimally processed food?                                                                                               | Yes                   |
| Do you prefer and consume with moderation trying to choose small portion sizes?                                                                                                                      | Yes                   |
| <i>Block 3: Physical Activity, Rest, Social habits and conviviality</i>                                                                                                                              |                       |
| Do you engage in physical activity (>150min/week or 30 min/day)? (jogging, walk at a fast pace, dance, aerobics, gardening)                                                                          | Yes                   |
| Do you sleep siesta/nap?                                                                                                                                                                             | Yes                   |
| How many hours do you sleep a day? (During weekdays)                                                                                                                                                 | 6-8 hour/day          |
| How many hours do you spend watching TV per day? (During weekdays)                                                                                                                                   | ≤1hour/day            |
| How many hours do you spend going out with friends during the free time (e.g. weekends)?                                                                                                             | ≥2hour/weekend        |
| How many hours do you practice team sports per week?                                                                                                                                                 | ≥2hour/week           |
| How many time do you spend having lunch during weekdays?                                                                                                                                             | ≥20min                |
| Do you usually eat in company (with family, friends, and colleagues)?                                                                                                                                | Yes                   |

\*0 points if these criteria are no met. s=serving

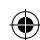

Supplement: NIHMS797448-supplement-01.pdf [file NIHMS797448-supplement-01.pdf]
